# Supplementary material for: Service delivery models for enhancing linkage to and retention in HIV care services for adolescent girls and young women and adolescent boys and young men: a protocol for an overview of systematic reviews
Source: PubMed Central journal article supplement — BMJ Open. 2022 Sep 19;12(9):e060778. doi: 10.1136/bmjopen-2022-060778 (PMC9486299; doi:10.1136/bmjopen-2022-060778), 2022-09-19
Supplement: bmjopen-2022-060778supp002.pdf [file bmjopen-2022-060778supp002.pdf]

## Search Strategy

| Database                    | Search strategy                                                                                                                                                                                                                                                                                                                                                                                                                                                                                                                                                                                                                                            |
|-----------------------------|------------------------------------------------------------------------------------------------------------------------------------------------------------------------------------------------------------------------------------------------------------------------------------------------------------------------------------------------------------------------------------------------------------------------------------------------------------------------------------------------------------------------------------------------------------------------------------------------------------------------------------------------------------|
| <b>PubMed</b>               | ((((((((HIV) OR HIV positive) OR HIV patient) OR HIV-1) OR AIDS)) AND (((((((Antiretroviral therapy) OR Antiretroviral medication) OR AIDS medication) OR AIDS treatment) OR ART) OR HAART) OR HIV treatment)) AND (((((((ART initiation) OR Linkage) OR Linkage to care) OR Linkage to HIV care) OR Referral to care) OR Intervention) OR Modalities)) AND (((((((Retention) OR Retention in care) OR Retention in HIV care) OR ART initiation) OR ART uptake) OR ART retention)) AND ((Systematic review) OR Meta-analysis)                                                                                                                              |
| <b>The Cochrane Library</b> | (HIV OR HIV positive OR HIV patient OR HIV-1 OR AIDS):ti,ab,kw AND (HIV treatment OR Antiretroviral medication OR AIDS medication OR AIDS treatment OR ART OR HAART OR HIV treatment):ti,ab,kw AND (ART initiation OR Linkage OR Linkage to care OR Linkage to HIV care OR Referral to care OR ART uptake):ti,ab,kw AND (Retention OR Retention in care OR Retention in HIV care OR ART retention HIV services OR HIV care modalities OR Linkage to care modalities OR Retention in care modalities OR Service delivery care modalities OR Interventions):ti,ab,kw AND (Systematic review OR Meta-analysis):ti,ab,kw" (Word variations have been searched) |

|                       |                                                                                                                                                                                                                                                             |
|-----------------------|-------------------------------------------------------------------------------------------------------------------------------------------------------------------------------------------------------------------------------------------------------------|
|                       |                                                                                                                                                                                                                                                             |
| <b>CINHAL</b>         | HIV OR human immune-deficiency virus AND antiretroviral therapy OR antiretrovirals OR antiretroviral treatment AND "Linkage to care" OR "Linkage to HIV care" OR "Referral to care" OR "retention in HIV care" AND "systematic review"                      |
| <b>Web of Science</b> | ((TS=(HIV-1 OR HIV ) AND TS=( antiretroviral therapy OR antiretrovirals OR antiretroviral treatment)) AND TS=( Linkage OR "Linkage to care" OR "Linkage to HIV care" OR "Referral to care")) AND TS=( systematic OR "systematic review" OR meta-analysis ). |
